# Supplementary material
Source: PubMed Central journal article supplement (PMC8259690)
Supplement: ASN.2020111618SupplementaryData.pdf [file ASN.2020111618SupplementaryData.pdf]

## **Supplemental data**

### **Table of content**

**Supplemental Table 1.** Clinical characteristics of patients according to SARS-CoV-2 IgG anti-NC response

**Supplemental Table 2.** Detailed characteristics of patients with absence of SARS-CoV-2 IgG anti-NC response

**Supplemental Table 3.** Clinical characteristics of patients with RT-PCR confirmed diagnosis, according to their initial SARS-CoV-2 IgG anti-NC antibody response

**Supplemental Table 4.** Multivariable analysis of factors associated with the absence of initial SARS-CoV-2 IgG anti-NC antibody response

**Supplemental Table 5.** Patient characteristics according to their long-term SARS-CoV-2 IgG anti-NC antibody response

**Supplemental Table 6.** Clinical and biological presentation of patients at diagnosis

**Supplemental Figure 1:** Evolution of SARS-CoV-2 IgG anti-spike antibody titers until 6 months after diagnosis

**Supplemental Table 1.** Clinical characteristics of patients according to SARS-CoV-2 IgG anti-NC response

| VARIABLE                                              | ALL PATIENTS<br>N = 83 | SEROPOS.<br>N = 74 | SERONEG.<br>N = 9 | P VALUE      |
|-------------------------------------------------------|------------------------|--------------------|-------------------|--------------|
| Age (years), median (IQR)                             | 65 (19.5)              | 64 (19.5)          | 66 (22)           | 0.274        |
| Male, n (%)                                           | 59 (71)                | 54 (73)            | 5 (56)            | 0.427        |
| Cause of nephropathy                                  |                        |                    |                   | <b>0.002</b> |
| Diabetes and/or vascular nephropathy, n (%)           | 55 (66)                | 52 (70)            | 3 (33)            | -            |
| Glomerular disease, n (%)                             | 16 (19)                | 10 (14)            | 6 (67)            | -            |
| Other, n (%)                                          | 12 (14)                | 12 (16)            | 0 (0)             | -            |
| Time from dialysis initiation (years), median (IQR)   | 3 (3.8)                | 3 (3.9)            | 2 (4.1)           | 0.584        |
| <b>Comorbidities</b>                                  |                        |                    |                   |              |
| Diabetes mellitus, n (%)                              | 40 (48)                | 37 (50)            | 3 (33)            | 0.485        |
| Hypertension, n (%)                                   | 79 (95)                | 71 (96)            | 8 (89)            | 0.374        |
| BMI >25 kg/m <sup>2</sup> , n (%)                     | 40/76 (52)             | 37/68 (54)         | 3/8 (38)          | 0.465        |
| Coronary disease, n (%)                               | 21 (25)                | 17 (23)            | 4 (44)            | 0.221        |
| Peripheral artery disease n (%)                       | 28 (34)                | 24 (32)            | 4 (44)            | 0.483        |
| Chronic heart failure                                 | 7 (8)                  | 5 (6)              | 2 (22)            | 0.165        |
| COPD/asthma                                           | 5 (6)                  | 5 (6)              | 0 (0)             | >0.999       |
| Cirrhosis, n (%)                                      | 2 (2)                  | 2 (2)              | 0 (0)             | 0.569        |
| Cancer, n (%)                                         | 5 (6)                  | 5 (7)              | 0 (0)             | 0.873        |
| Auto-immune disease, n (%)                            | 6 (7)                  | 2 (3)              | 4 (44)            | <b>0.001</b> |
| Immunocompromised, n (%)                              | 16 (19)                | 10 (17)            | 6 (67)            | <b>0.001</b> |
| Former kidney transplantation, n (%)                  | 6 (7)                  | 5 (6)              | 1 (11)            | 0.509        |
| Other organ transplantation, n (%)                    | 1 (11)                 | 1 (13)             | 0 (0)             | >0.999       |
| Immunosuppressive treatment, n (%)                    | 11 (13)                | 7 (9)              | 4 (44)            | <b>0.016</b> |
| HIV, n (%)                                            | 4 (4)                  | 3 (4)              | 1 (11)            | 0.374        |
| RAS inhibitor, n (%)                                  | 41 (49)                | 38 (51)            | 3 (33)            | 0.483        |
| ACE inhibitor, n (%)                                  | 16 (19)                | 14 (18)            | 2 (22)            | <0.999       |
| ARB, n (%)                                            | 25 (30)                | 24 (33)            | 1 (11)            | 0.264        |
| <b>Characteristics</b>                                |                        |                    |                   |              |
| Clinical presentation                                 |                        |                    |                   |              |
| Asymptomatic, n (%)                                   | 12 (14)                | 10 (14)            | 2 (22)            | 0.612        |
| Mild presentation, n (%)                              | 43 (52)                | 39 (53)            | 4 (44)            | 0.732        |
| Severe presentation, n (%)                            | 28 (34)                | 25 (34)            | 3 (33)            | >0.999       |
| Hospitalized, n (%)                                   | 41 (49)                | 36 (49)            | 5 (56)            | 0.696        |
| Ct-scan (>50% lesions), n (%)                         | 10/37 (26)             | 9/33 (27)          | 1/4 (25)          | >0.999       |
| RT-PCR diagnosis, n (%)                               | 64/80 (80)             | 59/71 (83)         | 5/9 (56)          | 0.073        |
| First SARS-CoV-2 IgG: value (Index S/C), median (IQR) | 5.8 (4.56)             | 6.5 (3.84)         | 0.06 (0.14)       | <0.0001      |
| Time from diagnosis (days), median (IQR)              | 67 (39)                | 68 (41.5)          | 51 (32.5)         | 0.11         |

| <b>Specific therapy</b>    |           |           |          |        |
|----------------------------|-----------|-----------|----------|--------|
| Hydrochloroquine, n (%)    | 2 (2.5)   | 2 (2.82)  | 0 (0)    | >0.999 |
| Macrolides, n (%)          | 14 (16.8) | 13 (17.6) | 1 (11.1) | >0.999 |
| Convalescent plasma, n (%) | 0 (0)     | 0 (0)     | 0 (0)    | -      |

Severe or mild presentation was defined according to the need of oxygen therapy. ACE: angiotensin converting enzyme, ARB: angiotensin receptor blocker, COPD: chronic obstructive pulmonary disease, HIV: human immunodeficiency virus, RAS: renin angiotensin system

**Supplemental table 2.** Detailed characteristics of patients with absence of SARS-CoV-2 IgG anti-NC response

| PAT. | AGE | SEX | CAUSE OF NEPHROPATHY            | TIME FROM DIALYSIS INITIATION (YEARS) | CV RISK FACTOR        | VASCU. DISEASE | ORGA N DYSF. | OTHER                                | IS THERAP Y                 | DIAG NOSI S | SYMPTOMS                 | CT-scan  | HOSPIT. | THE RAP Y <sup>O<sub>2</sub></sup> |
|------|-----|-----|---------------------------------|---------------------------------------|-----------------------|----------------|--------------|--------------------------------------|-----------------------------|-------------|--------------------------|----------|---------|------------------------------------|
| P1   | 63  | M   | ANCA vasculitis nephropathy     | <1                                    | HT ; DM ; smoker ; OW | Y              | -            | ANCA vasculitis                      | Steroid ; Cylcophosp hamide | CT-scan     | Cough, anosmia, agueusia | severe   | Y       | Y                                  |
| P2   | 66  | F   | AA amyloidosis                  | 1                                     | HT ; OW               | N              | -            | Rheumatoid arthritis with amyoidosis | Steroid                     | RT-qPCR     | Cough, Fever             | moderate | Y       | Y                                  |
| P3   | 91  | M   | Vascular                        | 2                                     | HT ; smoker           | Y              | CHF          | -                                    | -                           | CT-scan     | Fever, Dyspnea           | mild     | Y       | Y                                  |
| P4   | 74  | F   | FSGS                            | 1                                     | HT ; DM ; OW          | N              | -            | HIV                                  | -                           | RT-qPCR     | cough                    | -        | N       | N                                  |
| P5   | 69  | M   | Diabetic & vascular nephropathy | 9                                     | HT ; DM ; smoker      | Y              | -            | -                                    | -                           | RT-qPCR     | UK                       | -        | Y       | N                                  |
| P6   | 72  | F   | ANCA vasculitis nephropathy     | 5                                     | HT                    | N              | -            | ANCA vasculitis                      | MMF                         | CT-scan     | Cough, , Fever           | -        | Y       | Y                                  |
| P7   | 28  | M   | FSGS                            | <1                                    | -                     | N              | CHF ; COPD   | HLH                                  | Steroid ; Etoposide         | RT-qPCR     | UK                       | -        | N       | N                                  |
| P8   | 48  | M   | Glomerular disease              | 4                                     | HT                    | N              | -            | -                                    | -                           | RT-qPCR     | No symptoms              | -        | N       | N                                  |
| P9   | 50  | F   | Glomerular disease              | 9                                     | HT                    | Y              | -            | -                                    | -                           | CT-scan     | No symptoms              | Mild     | N       | N                                  |

PAT. : patient; FSGS : Focal and segmental glomerulosclerosis; HT : Hypertension; DM : Diabetes mellitus ; OW :overweight ; CHF : chronic heart failure ; Vasc: vascular ; Dysf. : dysfunction ;HLH: hemophagocytic lymphohistiocytosis; IS :Immunosuppressive ; O<sub>2</sub>: Oxygen therapy; Y : yes ; N = : No COPD: chronic obstructive pulmonary disease

**Supplemental table 3.** Clinical characteristics of patients with RT-PCR confirmed diagnosis, according to their initial SARS-CoV-2 IgG anti-NC antibody response

| VARIABLE                                            | ALL PATIENTS<br>N = 64 | SEROPOS.<br>N = 59 | SERONEG.<br>N = 5 | P VALUE      |
|-----------------------------------------------------|------------------------|--------------------|-------------------|--------------|
| Age (years), median (IQR)                           | 65 (21)                | 65 (22)            | 66 (33.5)         | 0.563        |
| Male, n (%)                                         | 49 (78)                | 46 (78)            | 3 (60)            | 0.583        |
| Cause of nephropathy                                |                        |                    |                   | 0.093        |
| Diabetes and/or vascular nephropathy, n (%)         | 41 (64)                | 39 (66)            | 2 (40)            | -            |
| Glomerular disease, n (%)                           | 12 (19)                | 9 (15)             | 3 (60)            | -            |
| Other, n (%)                                        | 11 (17)                | 11 (19)            | 0 (0)             | -            |
| Time from dialysis initiation (years), median (IQR) | 3 (4)                  | 3 (4.1)            | 1.2 (2.2)         | 0.07         |
| <b>Comorbidities</b>                                |                        |                    |                   |              |
| Diabetes mellitus, n (%)                            | 32 (50)                | 30 (51)            | 2 (40)            | >0.999       |
| Hypertension, n (%)                                 | 61 (95)                | 57 (97)            | 4 (80)            | 0.220        |
| BMI >25 kg/m <sup>2</sup> , n (%)                   | 31/58 (53)             | 29/53 (55)         | 2/5 (40)          | 0.656        |
| Coronary disease, n (%)                             | 15 (23)                | 14 (24)            | 1 (20)            | >0.999       |
| Peripheral artery disease, n (%)                    | 22 (34)                | 21 (36)            | 1 (20)            | 0.652        |
| Chronic heart failure                               | 6 (9)                  | 5 (8)              | 1 (20)            | 0.399        |
| COPD/asthma                                         | 5 (8)                  | 5 (8)              | 0 (0)             | >0.999       |
| Cirrhosis, n (%)                                    | 2 (3)                  | 2 (3)              | 0 (0)             | >0.999       |
| Cancer, n (%)                                       | 4 (6)                  | 4 (7)              | 0 (0)             | >0.999       |
| Auto-immune disease, n (%)                          | 4 (6)                  | 2 (3)              | 2 (40)            | <b>0.028</b> |
| Immunocompromised, n (%)                            | 12 (19)                | 9 (15)             | 3 (60)            | <b>0.042</b> |
| Former kidney transplantation, n (%)                | 4 (6)                  | 4 (7)              | 0 (0)             | >0.999       |
| Other organ transplantation, n (%)                  | 1 (2)                  | 1 (2)              | 0 (0)             | >0.999       |
| Immunosuppressive treatment, n (%)                  | 9 (14)                 | 7 (12)             | 2 (40)            | 0.141        |
| HIV, n (%)                                          | 4 (6)                  | 3 (5)              | 1 (20)            | 0.284        |
| RAS inhibitor, n (%)                                | 31 (48)                | 29 (49)            | 2 (40)            | >0.999       |
| ACE inhibitor, n (%)                                | 11 (17)                | 10 (17)            | 1 (20)            | >0.999       |
| ARBS, n (%)                                         | 20 (32)                | 19 (33)            | 1 (20)            | >0.999       |
| <b>Characteristics, n (%)</b>                       |                        |                    |                   |              |
| Clinical presentation                               |                        |                    |                   |              |
| Asymptomatic, n (%)                                 | 8 (13)                 | 7 (12)             | 1 (20)            | 0.499        |
| Mild, n (%)                                         | 33 (52)                | 30 (51)            | 3 (60)            | >0.999       |
| Severe, n (%)                                       | 23 (36)                | 22 (37)            | 1 (20)            | 0.646        |
| Hospitalized, n (%)                                 | 34 (53)                | 32 (54)            | 2 (40)            | 0.659        |

Severe or mild presentation was defined according to the need of oxygen therapy. ACE: angiotensin converting enzyme, ARB: angiotensin receptor blocker, COPD: chronic obstructive pulmonary disease, HIV: human immunodeficiency virus, RAS: renin angiotensin system

**Supplemental Table 4.** Multivariable analysis of factors associated with the absence of initial SARS-CoV-2 IgG anti-NC antibody response

| <b>VARIABLE</b>          | <b>OR (95%CI)</b>          | <b>P VALUE</b> |
|--------------------------|----------------------------|----------------|
| Chronic heart failure    |                            |                |
| No                       | Ref.                       |                |
| Yes                      | 7.551 (0.920-61.966)       | 0.060          |
| Immunocompromised status |                            |                |
| No                       | Ref.                       |                |
| Yes                      | <b>13.8 (2.763-69.126)</b> | <b>0.001</b>   |

**Supplemental Table 5.** Patient characteristics according to their long-term SARS-CoV-2 IgG anti-NC antibody response

| VARIABLE                                            | ALL PATIENTS<br>N = 60 | SEROPOS.<br>N = 45 | SERONEG.<br>N = 15 | P VALUE           |
|-----------------------------------------------------|------------------------|--------------------|--------------------|-------------------|
| Age (years), median (IQR)                           | 63 (18)                | 63 (15)            | 63 (20)            | 0.925             |
| Male, n (%)                                         | 43 (72)                | 34 (76)            | 9 (60)             | 0.324             |
| <b>Cause of nephropathy</b>                         |                        |                    |                    |                   |
| Diabetes and/or vascular nephropathy, n (%)         | 43 (72)                | 31 (68)            | 12 (80)            | 0.806             |
| Glomerular disease, n (%)                           | 9 (15)                 | 7 (16)             | 2 (13)             | -                 |
| Other, n (%)                                        | 8 (13)                 | 7 (16)             | 1 (7)              | -                 |
| Time from dialysis initiation (years), median (IQR) | 3 (3.3)                | 3.3 (3.2)          | 2.1 ( 3.4)         | 0.522             |
| <b>Comorbidities</b>                                |                        |                    |                    |                   |
| Diabetes mellitus, n (%)                            | 30 (50)                | 21 (47)            | 9 (60)             | 0.371             |
| Hypertension, n (%)                                 | 59 (98)                | 44 (97)            | 15 (100)           | >0.999            |
| BMI >25 kg/m <sup>2</sup> , n(%)                    | 32 (59)                | 24 (57)            | 8 (60)             | >0.999            |
| Coronary disease, n (%)                             | 12 (20)                | 9 (20)             | 3 (20)             | >0.999            |
| Peripheral artery disease n (%)                     | 18 (31)                | 11 (24)            | 7 (47)             | 0.192             |
| Chronic heart failure                               | 3 (5)                  | 3 (7)              | 0 (0)              | 0.566             |
| COPD/asthma                                         | 3 (5)                  | 2 (4)              | 1 (7)              | >0.999            |
| Cirrhosis, n (%)                                    | 2 (3)                  | 1 (2)              | 1 (7)              | >0.999            |
| Cancer, n (%)                                       | 4 (6)                  | 3 (7)              | 1 (7)              | >0.999            |
| Auto-immune disease, n (%)                          | 1 (1)                  | 1 (2)              | 0 (0)              | >0.999            |
| Immunocompromised, n (%)                            | 7 (12)                 | 4 (9)              | 3 (20)             | 0.351             |
| Former kidney transplantation, n (%)                | 3 (5)                  | 1 (2)              | 2 (13)             | 0.151             |
| Other organ transplantation, n (%)                  | 1 (11)                 | 1 (13)             | 0 (0)              | >0.999            |
| Immunosuppressive treatment, n (%)                  | 4 (7)                  | 3 (7)              | 1 (7)              | >0.999            |
| HIV, n (%)                                          | 3 (5)                  | 2 (4)              | 1 (7)              | >0.999            |
| RAS inhibitor, n (%)                                | 34 (57)                | 26 (58)            | 8 (53)             | 0.764             |
| ACE inhibitor, n (%)                                | 12 (20)                | 8 (17)             | 4 (27)             | 0.479             |
| ARB, n (%)                                          | 22 (37)                | 18 (41)            | 4 (27)             | 0.325             |
| <b>Characteristics</b>                              |                        |                    |                    |                   |
| Clinical presentation                               |                        |                    |                    |                   |
| Asymptomatic, n (%)                                 | 9 (15)                 | 6 (13)             | 3 (20)             | 0.678             |
| Mild, n (%)                                         | 33 (55)                | 24 (53)            | 9 (53)             | 0.768             |
| Severe, n (%)                                       | 18 (30)                | 15 (33)            | 3 (20)             | 0.517             |
| Hospitalized, n (%)                                 | 26 (43)                | 21 (47)            | 5 (33)             | 0.367             |
| IgG pic value (Index S/C), median (IQR)             | 6.7 (3.8)              | 7.1 (2.3)          | 3.44 (1.6)         | <b>&lt;0.0001</b> |
| Time from diagnosis(days), median (IQR)             | 70.5 (54)              | 71 (68)            | 70 (35)            | 0.323             |
| <b>Last follow up</b>                               |                        |                    |                    |                   |
| IgG value (Index S/C), at last Fup, median (IQR)    | 3.240 (3.79)           | 4.02 (3.05)        | 0.97 (0.68)        | <b>&lt;0.0001</b> |
| Time from diagnosis (days), median (IQR)            | 189.5 (14.8)           | 189 (15)           | 190 (9)            | 0.764             |

Severe or mild presentation was defined according to the need of oxygen therapy. ACE: angiotensin converting enzyme, ARB: angiotensin receptor blocker, COPD: chronic obstructive pulmonary disease, HIV: human immunodeficiency virus, RAS: renin angiotensin system, Fup : Follow up

**Supplemental Table 6. Clinical and biological presentation of patients at diagnosis**

|                                               | <b>ALL PATIENTS<br/>N = 83</b> |
|-----------------------------------------------|--------------------------------|
| <b>Clinical presentation</b>                  |                                |
| Asymptomatic, n (%)                           | 12 (14.4)                      |
| Fever, n (%)                                  | 39 (46.9)                      |
| Dyspnea, n (%)                                | 16 (19.2)                      |
| Fatigue, n (%)                                | 31 (37.3)                      |
| Flu-like symptoms, n (%)                      | 36 (43.3)                      |
| Diarrhea, n (%)                               | 12 (14.4)                      |
| Anosmia, n (%)                                | 2 (2.40)                       |
| Time from symptoms onset (days), median (IQR) | 2 (4.5)                        |
| <b>Biological presentation</b>                |                                |
| C-reactive protein (g/l), median (IQR)        | 57.5 (106.9)                   |
| Procalcitonin (ng/ml), median (IQR)           | 1.3 (2.2)                      |
| Hemoglobin (g/dl), median (IQR)               | 10.25 (2.3)                    |
| Leucocytes (G/l), median (IQR)                | 4.7 (3)                        |
| Lymphocytes (G/l), median (IQR)               | 0.796 (0.71)                   |
| <b>Severity assessment</b>                    |                                |
| Oxygen therapy, n (%)                         | 28 (34)                        |
| Hospitalization, n (%)                        | 41 (49)                        |
